# Supplementary material
Source: publisher site journal article supplement (https://www.dovepress.com/article/435740)
Supplement: Supplementary file 1 [file get_supplementary_file.php]

**Supplementary Table 1: Posthoc pairwise comparison from Linear mixed effects models**

| **Subscale** | **Contrast** | **Estimate** | **SE** | **p-value** |
| --- | --- | --- | --- | --- |
| ESDM RC | T0 – T1 | -14.20 | 1.30 | **<0.001** |
| Verbal – Minimally verbal group | 3.20 | 2.96 | 0.290 |
| ESDM EC | T0 – T1 | -12.80 | 1.25 | **<0.001** |
| Verbal – Minimally verbal group | 5.18 | 2.36 | **0.039** |
| ESDM SS | T0 – T1 | -16.20 | 1.89 | **<0.001** |
| Verbal – Minimally verbal group | 5.37 | 2.69 | **0.050** |

*Adjusted for all covariates*
